# Supplementary material for: Direct Visualization of the Hydration Layer on Alumina Nanoparticles with the Fluid Cell STEM in situ
Source: PubMed Central journal article supplement (PMC4440531; doi:10.1038/srep09830), 2015-05-21
Supplement: srep09830-s1.pdf [file srep09830-s1.pdf]

## Supplementary Material

### Direct Visualization of the Hydration Layer on Alumina Nanoparticles with the Fluid Cell STEM in situ

*Emre Firlar<sup>†</sup>, Simge Çinar<sup>‡\*</sup>, Sanjay Kashyap<sup>†\*</sup>, Mufit Akinc<sup>†‡§</sup> and Tanya Prozorov<sup>†§</sup>*

<sup>†</sup>Division of Materials Science and Engineering, US DOE Ames Laboratory, Ames IA, 50011, USA

<sup>‡</sup>Department of Materials Science and Engineering, Iowa State University, Ames IA, 50011, USA

\* These authors contributed equally to the project

<sup>§</sup> Address correspondence to

Phone: +1-515-294-0738. Fax: +1-515-294-5444. E-mail: [makinc@iastate.edu](mailto:makinc@iastate.edu)

Phone: +1-515-294-3376. Fax: +1-515-294-8727. E-mail: [tprozoro@ameslab.gov](mailto:tprozoro@ameslab.gov)

XPS analysis was used to monitor the surface evolution of alumina powders exposed to different conditions, as shown in **Figure S1**. Using the best-fit peak analysis, several spectral signatures present in the XPS peaks could be, tentatively, assigned to various aluminum oxides and hydroxides. As-received powder exhibits surface deposit attributed to the absorbed atmospheric gases, associated with the lower-energy carbon peak. Examination of O 1s spectra shows that exposed to atmosphere powder exhibits some degree of hydroxylation, as evidenced by the interplay of the oxidic and hydroxidic peaks reported by Lefèrve and co-authors<sup>37</sup>. Drying the hydrated powder at 40 °C overnight reduces the amount of the absorbed gas, decreases the hydroxidic component, and leads to the overall homogenization of the surface. Ethanol-modified powder exhibits a single-peak oxygen spectrum, providing further evidence of the effective removal of surface deposit observed by the BF TEM.

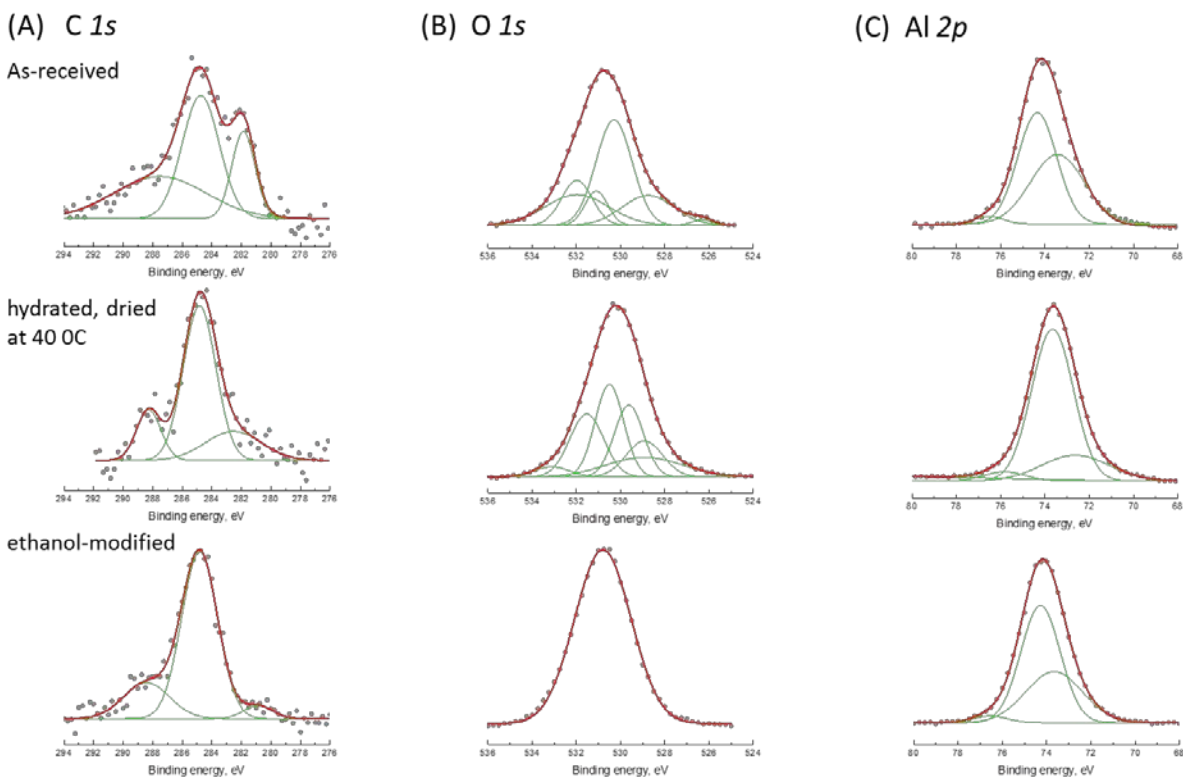

**Figure S1** XPS spectra acquired on alumina powder exposed to different conditions: (A) C1s peaks, (B) O1s peaks, (C) Al2p peaks.

**Table S1** Peak fitting analysis of the EELS spectra presented in **Figure 5**.

|                         | Peak Index | Center Max (eV) | Max Height | FWHM (eV) |
|-------------------------|------------|-----------------|------------|-----------|
| 1 (as-received alumina) | 1          | 532.54          | 0.03       | 4.19      |
|                         | 2          | 537.57          | 0.37       | 3.88      |
|                         | 3          | 541.52          | 0.96       | 6.08      |
|                         | 4          | 548.98          | 0.24       | 6.86      |
|                         | 5          | 559.82          | 0.33       | 13.97     |

|                                                                             |   |        |      |       |
|-----------------------------------------------------------------------------|---|--------|------|-------|
|                                                                             | 6 | 573.92 | 0.07 | 9.7   |
| 2 (hydrated alumina)                                                        | 1 | 530.98 | 0.08 | 8.12  |
|                                                                             | 2 | 537.22 | 0.28 | 4.24  |
|                                                                             | 3 | 540.04 | 0.34 | 5.32  |
|                                                                             | 4 | 544.16 | 0.14 | 6.7   |
|                                                                             | 5 | 550.34 | 0.02 | 1.22  |
|                                                                             | 6 | 555.73 | 0.11 | 21.88 |
|                                                                             | 7 | 561.49 | 0.16 | 12.75 |
| 3 (ethanol-modified alumina nanoparticles)                                  | 1 | 537.08 | 0.39 | 3.77  |
|                                                                             | 2 | 541.05 | 0.9  | 5.53  |
|                                                                             | 3 | 544.5  | 0.04 | 2.47  |
|                                                                             | 4 | 548.44 | 0.18 | 6.43  |
|                                                                             | 5 | 559.45 | 0.18 | 12.1  |
| 4 ( $\gamma$ -Al <sub>2</sub> O <sub>3</sub> from Reference <sup>29</sup> ) | 1 | 538.02 | 0.23 | 2.74  |
|                                                                             | 2 | 541.73 | 0.85 | 6.57  |
|                                                                             | 3 | 550.19 | 0.1  | 4.58  |
|                                                                             | 4 | 561.54 | 0.16 | 8.4   |
| 5 (Al(OH) <sub>3</sub> ) from Reference <sup>30</sup> )                     | 1 | 522.64 | 0.09 | 2.79  |
|                                                                             | 2 | 531.42 | 0.81 | 7.65  |

|                                           |   |        |      |       |
|-------------------------------------------|---|--------|------|-------|
|                                           | 3 | 536.95 | 0.24 | 10.26 |
|                                           | 4 | 550.36 | 0.42 | 16.95 |
|                                           | 5 | 565.46 | 0.14 | 18.05 |
| 6 (AlO(OH) from Reference <sup>31</sup> ) | 1 | 537.34 | 0.24 | 2.52  |
|                                           | 2 | 538.92 | 0.58 | 4.97  |
|                                           | 3 | 542.71 | 0.44 | 8.84  |
|                                           | 4 | 556.87 | 0.27 | 15.73 |

Using the peak fitting analyses, the EEL spectra obtained for O K-edge were analyzed and tried to be related to the O K-edges of reference  $\gamma\text{-Al}_2\text{O}_3$ <sup>29</sup> (4), reference  $\alpha\text{-Al(OH)}_3$ <sup>30</sup> (5) and reference  $\text{AlO(OH)}$ <sup>31</sup> (6).

Using the fluid cell STEM imaging schematically shown in **Figure SI 2**, it was possible to visualize alumina nanoparticle suspensions in liquid, their fully hydrated state *in situ*. It is worth noting, that such an experiment cannot be carried out using any conventional microscopy technique. In the current work, alumina nanoparticle suspension was sandwiched between the  $\text{Si}_3\text{N}_4$  windows and imaged with a focused scanning STEM probe in the thin liquid layer.

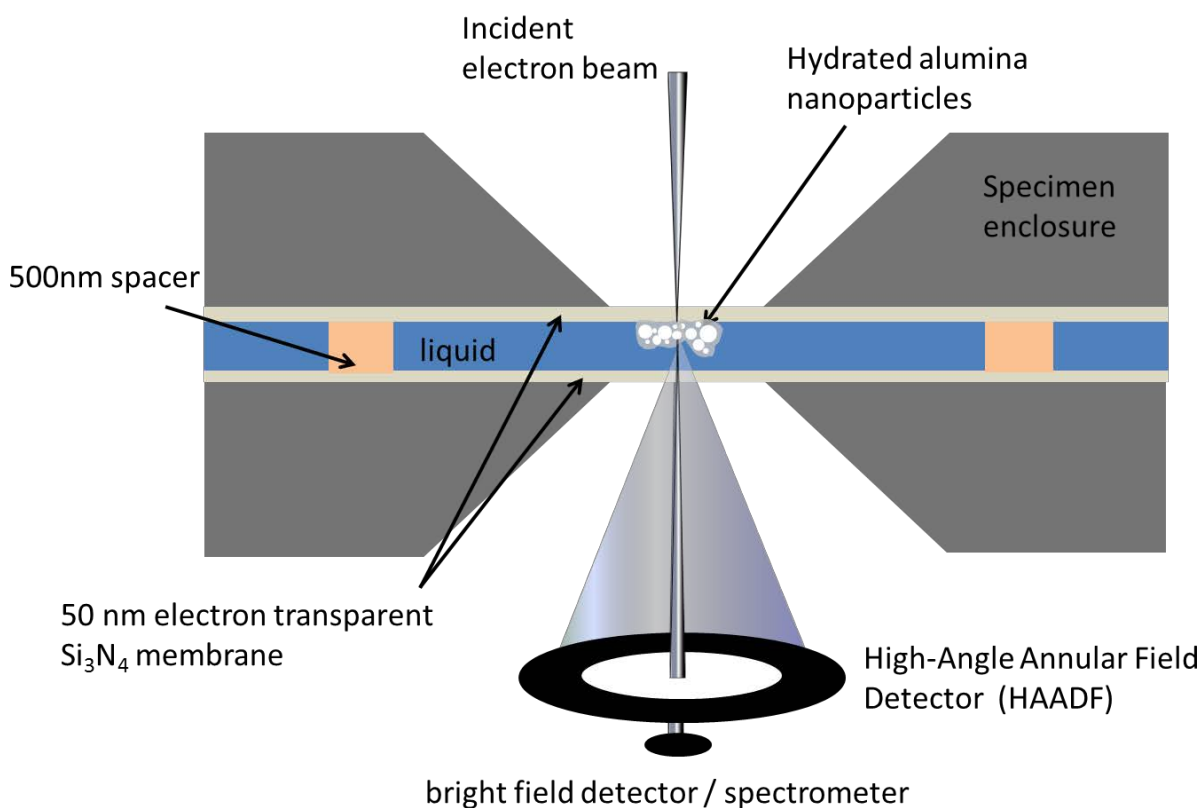

**Figure S2** In situ fluid cell STEM schematics. Alumina nanoparticle suspensions are sandwiched between the two electron-transparent  $\text{Si}_3\text{N}_4$  windows and imaged with a focused scanning STEM probe in the thin liquid layer.
